# Supplementary material for: Enhanced adsorption capacity and selectivity towards salicylic acid in water by a cationic polymer functionalized 3-D ordered macroporous adsorbent
Source: Royal Society of Chemistry journal article supplement (doi:10.1039/c3sm00096f), 2013-01-01
Supplement: c3sm00096f.pdf [file c3sm00096f.pdf]

Supporting Information for

## Enhanced Adsorption Capacity and Selectivity towards Salicylic Acid in Water by a Cationic Polymer Functionalized 3-D Ordered Macroporous Adsorbent

Xu Zhang\*, Guohui Li, Hongqi Zhang, Xiaomei Wang, Jiayan Qu, Pange Liu, Yanning Wang

Department of Polymer Science and Engineering, Hebei University of Technology, Tianjin 300130, China

### Supporting Text

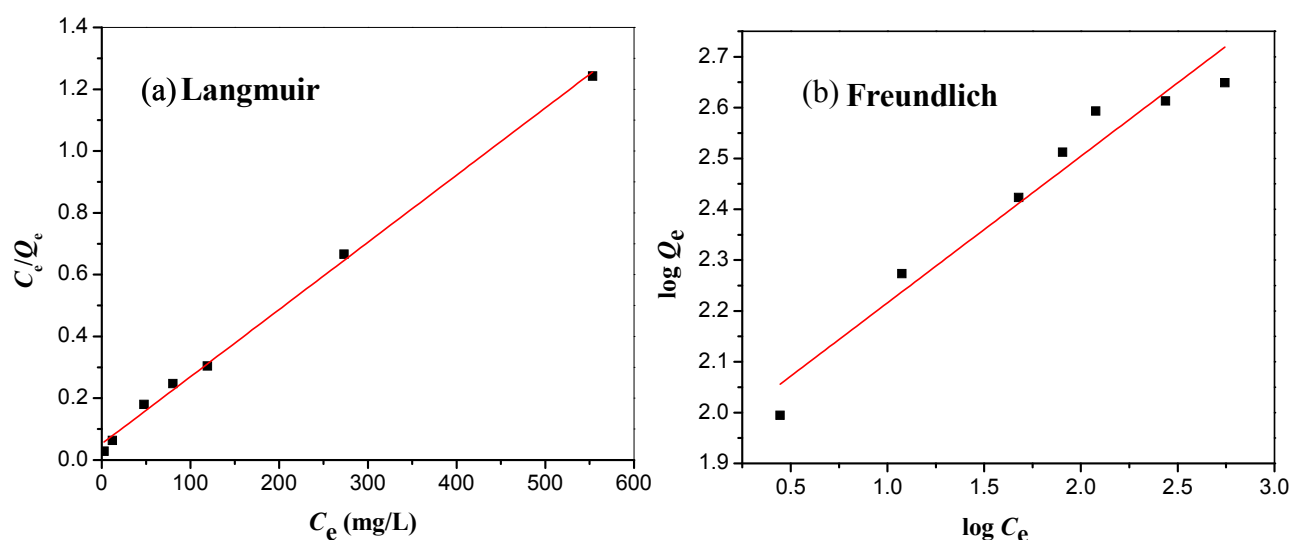

**Figure S1.** Linear fitting of the isotherm data by Langmuir (a) and Freundlich (b) models.

**Table S1.** Correlated parameters of the equilibrium data for the adsorption of SA on 3DOM CLPS-g-PDMAEMA from aqueous solution according to Langmuir and Freundlich equations at 303 K.

| Langmuir equation |              |        | Freundlich equation                    |       |        |
|-------------------|--------------|--------|----------------------------------------|-------|--------|
| $K_L$ (L/g)       | $Q_m$ (mg/g) | $R^2$  | $K_F$ ([(mg/g)(L/mL) <sup>1/n</sup> ]) | $n$   | $R^2$  |
| 0.042             | 450          | 0.9971 | 85                                     | 4.283 | 0.9413 |
